# Supplementary material for: Clusterin negatively modulates mechanical stress-mediated ligamentum flavum hypertrophy through TGF-β1 signaling
Source: PubMed Central journal article supplement (PMC9534863; doi:10.1038/s12276-022-00849-2), 2022-09-21
Supplement: 12276_2022_849_MOESM1_ESM.pdf [file 12276_2022_849_MOESM1_ESM.pdf]

**Supplementary Table 1. The Sequencing Primers**

| Genes   | Primer sequences                |
|---------|---------------------------------|
| siALK5  | F: 5'-GACUAAUCCUCGAGAUATT-3'    |
|         | R: 5'- UAUCUCGAGGAAUUAAGUCTT-3' |
| siPRKD3 | F: 5'- CGAUAUGUCAGUACUGCAATT-3' |
|         | R: 5'- UUGCAGUACUGACAUUCGTT-3'  |

**Supplementary Table 2. The qRT-PCR primer sequence**

| Genes          | Primer sequences                 |
|----------------|----------------------------------|
| CLU            | F: 5'- AGCTCGCTGAGAAGTTCACC-3'   |
|                | R: 5'- TTGTGGGAAGACACCGTGG-3'    |
| TGF- $\beta$ 1 | F: 5'-TACCTGAACCCGTGTTGCTC-3'    |
|                | R: 5'- CCGGTAGTGAACCCGTTGAT-3'   |
| COL1A2         | F: 5'-TGGTCTCGGTGGAACTTTG-3'     |
|                | R: 5'- CACCCTGTGGTCCAACAAC-3'    |
| $\alpha$ -SMA  | F: 5'- AGCCAAGCACTGTCAGGAAT-3'   |
|                | R: 5'- CACCATCACCCCTGATGTC-3'    |
| PRKD3          | F: 5'- GAGCCTGCCACTGCTAACTA-3'   |
|                | R: 5'- GTCCTCATTTTCATTCTGGGGG-3' |
| GAPDH          | F: 5'- GGATTTGGTTCGTATTGGGCG-3'  |
|                | R: 5'- TCCCGTTCAGCCATGTAGT-3'    |

**Supplementary Table 3.**

| Variable            | Non-LFH Group<br>(n=22) | LFH Group<br>(n=22) | P value |
|---------------------|-------------------------|---------------------|---------|
| Age(years)          | 44.91 $\pm$ 2.59        | 61.23 $\pm$ 1.28    | <0.01   |
| Gender(male:female) | 12:10                   | 12:12               |         |
| LF thickness        | 3.05 $\pm$ 0.09         | 5.91 $\pm$ 0.20     | <0.01   |
| Lumbar level        | L4/5                    | L4/5                |         |
